# Supplementary material for: Changes in secondhand smoke exposure levels and risk of type 2 diabetes in middle age: the Korean Genome and Epidemiology Study (KoGES)
Source: PubMed Central journal article supplement (PMC6904168; doi:10.1136/bmjdrc-2019-000859), 2019-12-08
Supplement: bmjdrc-2019-000859supp001.pdf [file bmjdrc-2019-000859supp001.pdf]

**Supplementary materials****" Changes of Second-hand smoke exposure levels and risk of type 2 diabetes in middle age: The Korean Genome and Epidemiology Study (KoGES)"**

Joeeun Jeon<sup>1,2</sup>, Keum Ji Jung<sup>2</sup>, **Heejin Kimm<sup>2‡</sup>**, Sun Ha Jee<sup>2</sup>

<sup>1</sup>Department of Public Health, Graduate School, Yonsei University, Seoul, Korea

<sup>2</sup>Department of Epidemiology and Health Promotion, Institute for Health Promotion,

Graduate School of Public Health, Yonsei University

**‡ Heejin Kimm, PhD, MD (Corresponding Author):**

Department of Epidemiology and Health Promotion, Graduate School of Public Health,

Yonsei University

50 Yonsei-ro, Seodaemun-gu, Seoul, 03722, Republic of Korea

Tel: 82-2-2228-1531; Fax: 82-2-365-5118; E-mail: [heejink@yuhs.ac](mailto:heejink@yuhs.ac)

## Supplementary materials

Supplementary Table 1. Hazard ratios (95% CI) for risk of type 2 diabetes according to trajectories of Secondhand smoking exposure levels among women, N=1,798

|                                              | Unadjusted model <sup>*</sup> | Multivariable model <sup>a</sup> | Fully adjusted model <sup>b</sup> |
|----------------------------------------------|-------------------------------|----------------------------------|-----------------------------------|
|                                              | RR (95% CI)                   | RR (95% CI)                      | RR (95% CI)                       |
| Trajectories of Second-hand smoking exposure |                               |                                  |                                   |
| Low-stable                                   | 1.00                          | 1.00                             | 1.00                              |
| Moderate to low                              | 0.75 (0.57-1.00)              | 0.65 (0.49-0.86)                 | 0.91 (0.65-1.29)                  |
| Moderate                                     | 0.79 (0.49-1.26)              | 0.68 (0.42-1.10)                 | 0.67 (0.38-1.18)                  |
| High to low                                  | <b>1.63 (1.13-2.37)</b>       | <b>1.69 (1.16-2.47)</b>          | <b>1.78 (1.12-2.83)</b>           |
| P for trend                                  | <b>0.0104</b>                 | <b>0.0072</b>                    | <b>0.0642</b>                     |

Abbreviation: RR, Risk ratio; CI, confidence interval

<sup>a</sup>Model Adjusted for age, family history of type 2 diabetes, alcohol drinking status, physical exercise, and body mass index, systolic blood pressure, total cholesterol level, educational levels, and household income at baseline

<sup>b</sup>Model Adjusted for Multivariable model + body mass index, systolic blood pressure, and total cholesterol level at endline

## Supplementary materials

**Supplementary Table 2. Hazard ratios (95% CI) for risk of impaired fasting glucose according to trajectories of Secondhand smoking exposure levels among women, N=1,798**

|                                              | Unadjusted model <sup>a</sup> | Multivariable model <sup>a</sup> | Fully adjusted model <sup>b</sup> |
|----------------------------------------------|-------------------------------|----------------------------------|-----------------------------------|
|                                              | RR (95% CI)                   | RR (95% CI)                      | RR (95% CI)                       |
| Trajectories of Second-hand smoking exposure |                               |                                  |                                   |
| Low-stable                                   | 1.00                          | 1.00                             | 1.00                              |
| Moderate to low                              | <b>1.30 (1.08-1.56)</b>       | <b>1.24 (1.04-1.49)</b>          | <b>1.35 (1.10-1.66)</b>           |
| Moderate                                     | <b>2.08 (1.63-2.66)</b>       | <b>1.92 (1.50-2.46)</b>          | <b>1.39 (1.06-1.82)</b>           |
| High to low                                  | <b>1.31 (1.00-1.72)</b>       | <b>1.36 (1.03-1.78)</b>          | <b>1.54 (1.14-2.07)</b>           |
| P for trend                                  | <b>0.0003</b>                 | <b>0.0003</b>                    | <b>0.0083</b>                     |

Abbreviation: RR, Risk ratio; CI, confidence interval

<sup>a</sup>Model Adjusted for age, family history of type 2 diabetes, alcohol drinking status, physical exercise, and body mass index, systolic blood pressure, total cholesterol level, educational levels, and household income at baseline

<sup>b</sup>Model Adjusted for Multivariable model + body mass index, systolic blood pressure, and total cholesterol level at endline

## Supplementary materials

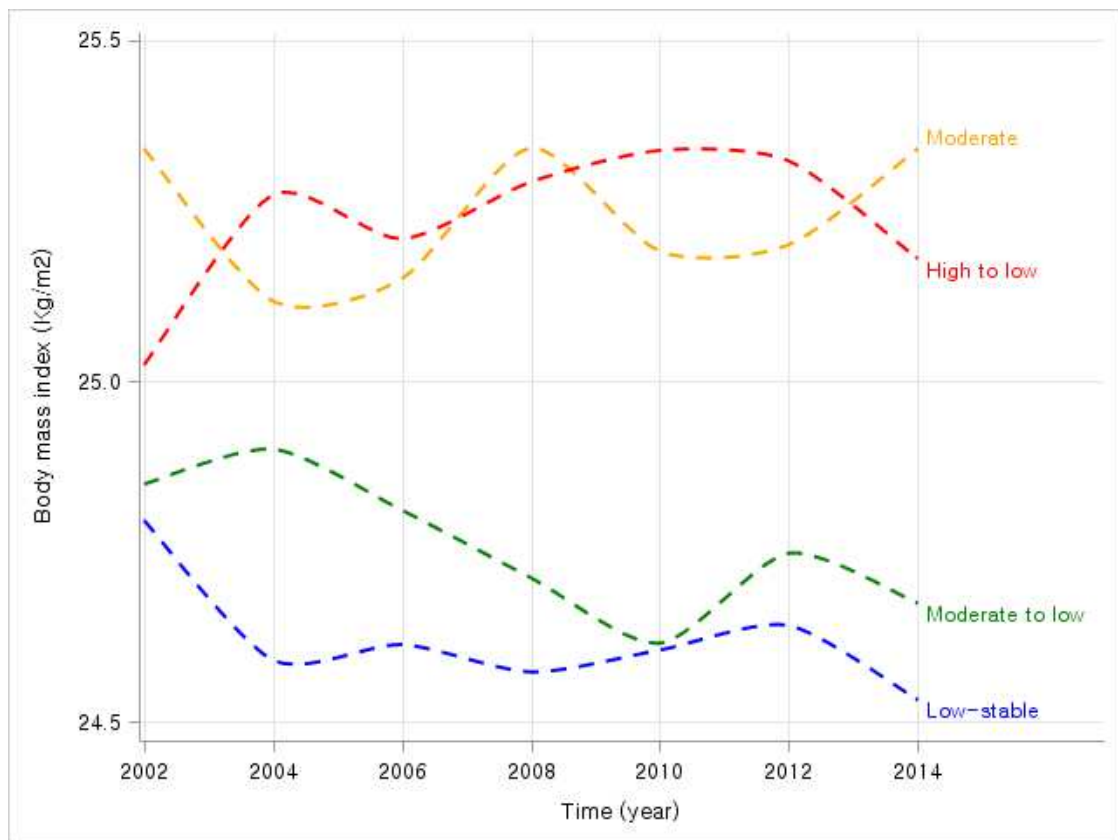

**Supplementary Figure 1. Changes in body mass index during follow-up period by trajectory groups of secondhand smoking exposure levels**

## Supplementary materials

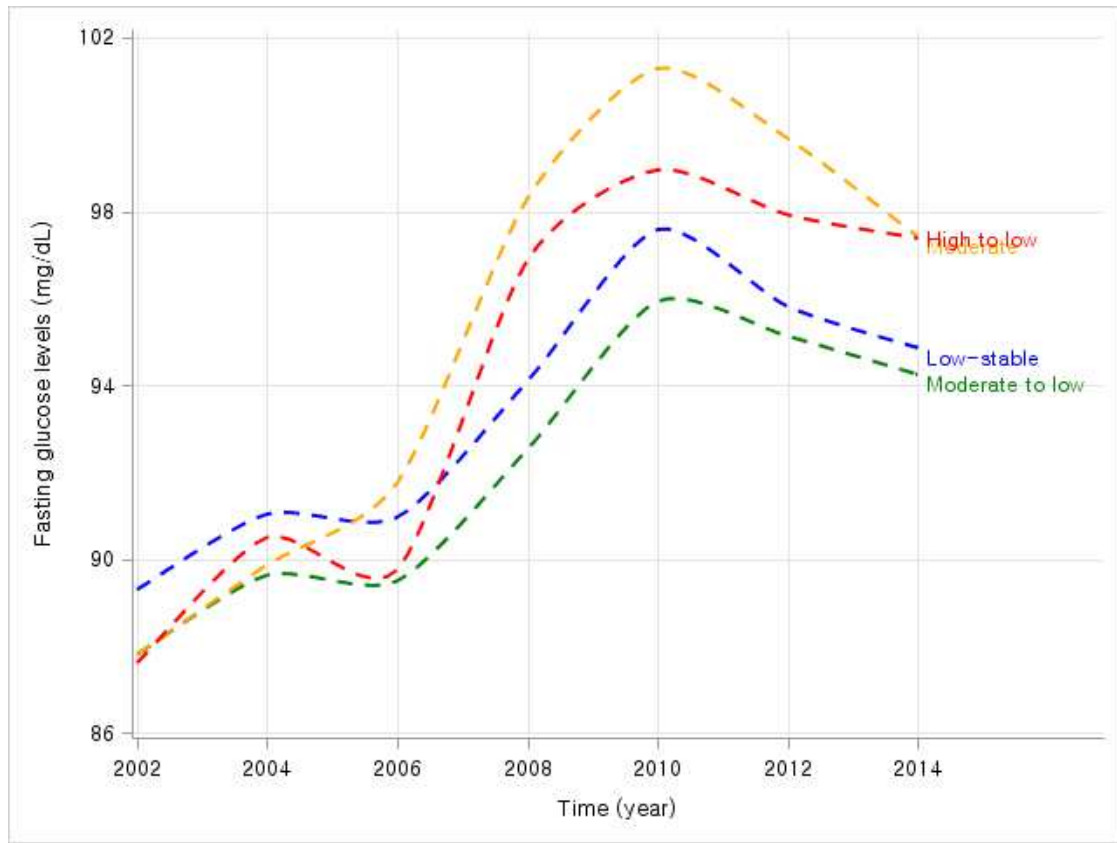

**Supplementary Figure 2. Changes in fasting glucose level during follow-up period by trajectory groups of secondhand smoking exposure levels**

## Supplementary materials

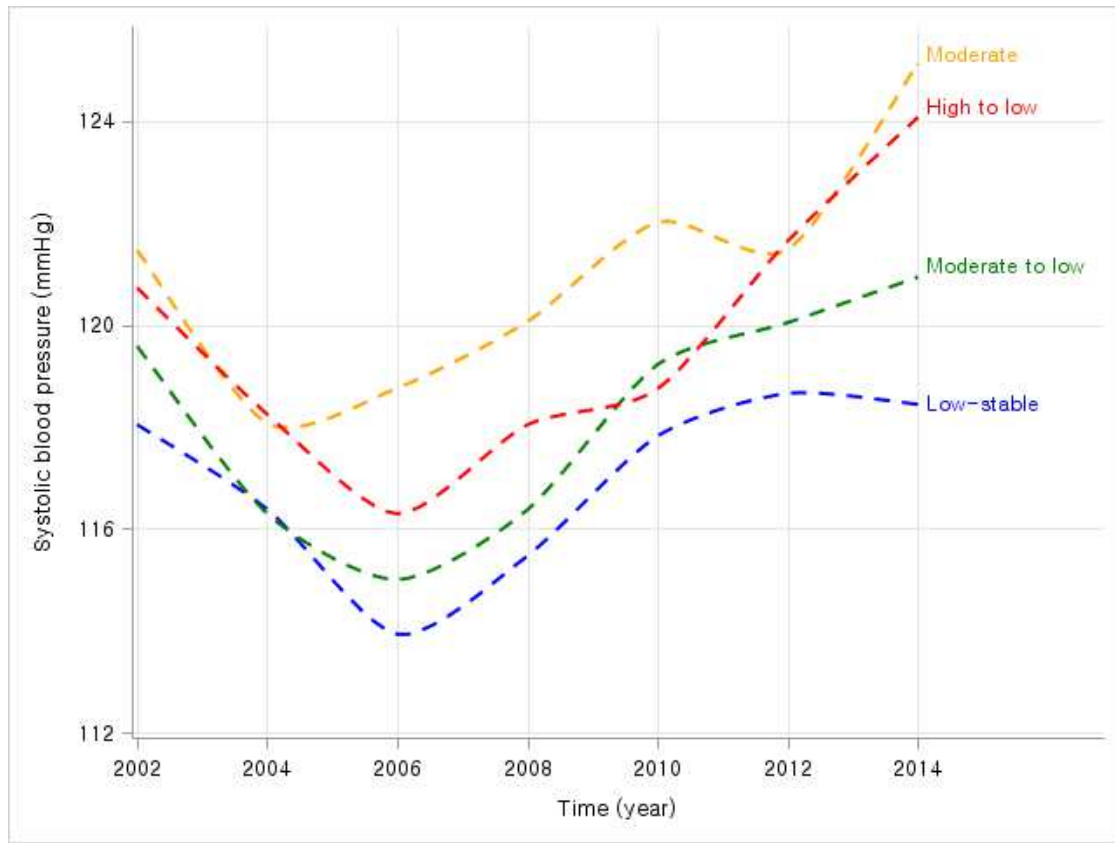

**Supplementary Figure 3. Changes in systolic blood pressure during follow-up period by trajectory groups of secondhand smoking exposure levels**
